# Supplementary material
Source: Springer Nature journal article supplement (https://www.springermedizin.de/resource/supplementary/12885_2010_2601_MOESM9_ESM.pdf/9461552)

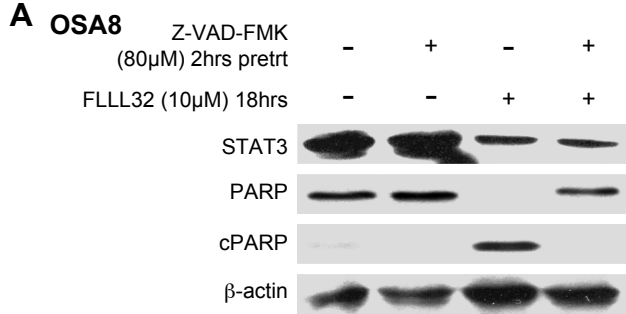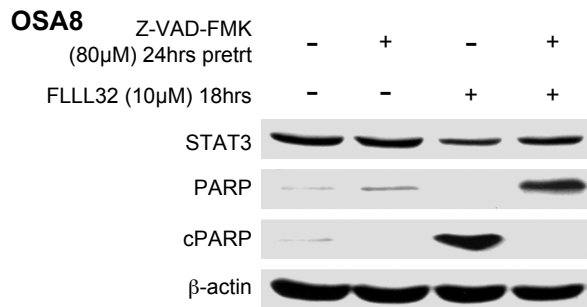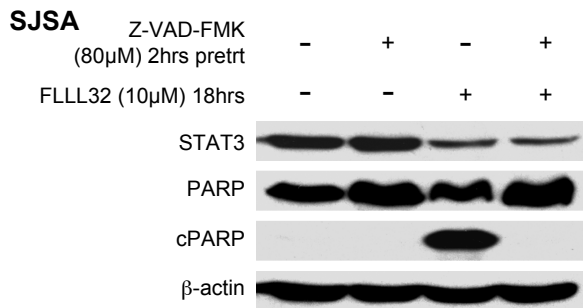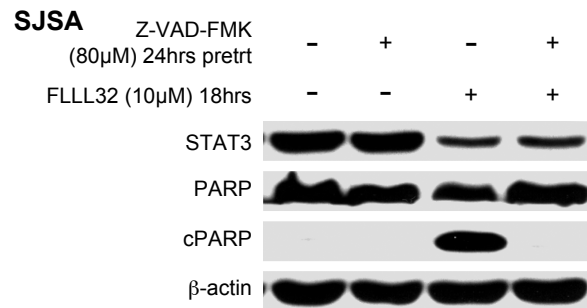

**B 2 hrs pretreatment**

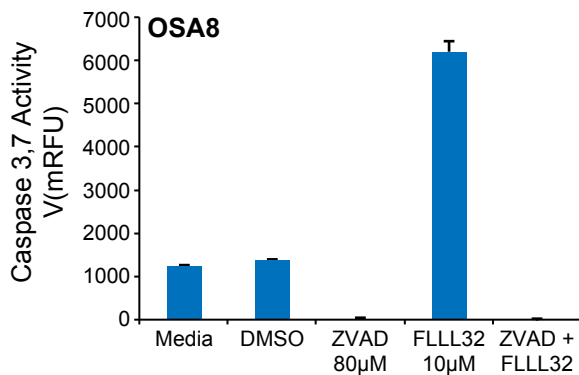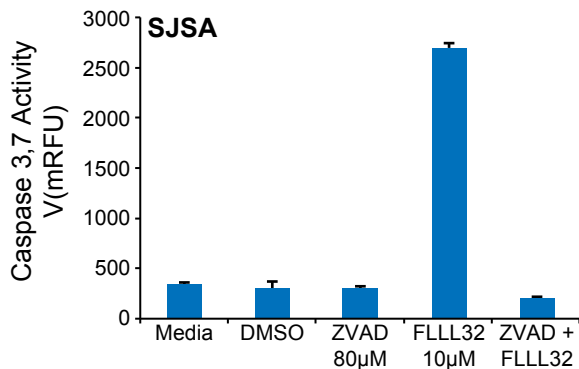

**24 hrs pretreatment**

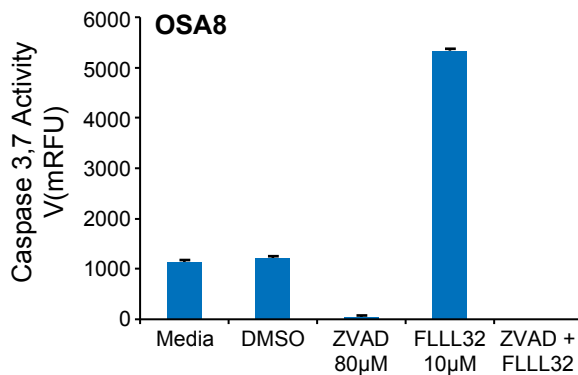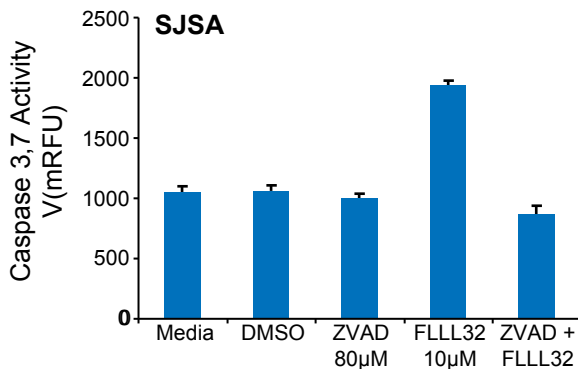

Supplement: MOESM9 [file 9461552]
